# Supplementary material for: Functional characterization of BjCET3 and BjCET4, two new cation-efflux transporters from Brassica juncea L
Source: PubMed Central journal article supplement — J Exp Bot. 2011 Jun 7;62(13):4467–80. doi: 10.1093/jxb/err137 (PMC3170545; doi:10.1093/jxb/err137), 2011-06-07
Supplement: supp_err137_00059527-file001.pdf [file supp_err137_00059527-file001.pdf]

**Functional characterization of *BjCET3* and *BjCET4*, two new cation-efflux transporters  
from *Brassica juncea* L.**

Minglin Lang, Mengyu Hao, Qiangwang Fan, Wei Wang, Shaojing Mo, Weicheng Zhao, Jie  
Zhou

**Supporting information**

**Figure legends**

**Fig. S1.** Multiple alignment analysis of deduced amino acid sequences of the CE proteins. Clustal X software were used for multiple alignments of deduced amino acid sequences of the CE proteins. Conserved amino acid and putative zinc binding site were indicated. Accession numbers and species names of each gene are shown in supplemental Table S2.

**Fig. S2.** Testing the effect of Cd stress on the growth of *B. juncea*. A serial of Cd concentration (0, 25, 200, 500, 1000, 5000  $\mu\text{M}$   $\text{CdCl}_2$ ) and 0-16 days time course were used for the treatment. The photographs showed no significant harmful effect on the *B. juncea* plants in the two days of Cd treatment (A, B). After 16 d Cd treatment, plants treated with 25  $\mu\text{M}$   $\text{CdCl}_2$  grew normally as the control (without Cd treatment), plants treated with 200 and 500  $\mu\text{M}$   $\text{CdCl}_2$  grew similar to each other, and a little more worse than control and 25  $\mu\text{M}$   $\text{CdCl}_2$  treated plants (C). Plants treated with 1000 and 5000  $\mu\text{M}$   $\text{CdCl}_2$  grew much worse than the others (C).

**Fig. S3.** A representative of zinc-tolerance assay plates. The image shows growth of vector control and *BjCET4* expressing *cot1& zrc1* strains. Disks 1–5 containing 1.2, 2.4, 4, 6, and 8  $\mu\text{mol}$  of Zn, respectively.

**Fig. S4.** Analysis of the effect of expressing *BjCET3* and *BjCET4* in *cot1* mutant yeast with over supplied metal ions. Expression of *BjCET3* and *BjCET4* restore growth of empty vector (pYES2) transformed *cot1* yeast strain under metal stressed condition. Growth on SMM-Uracil liquid medium (6.7 g yeast nitrogen base without amino acids, 20 mg histidine and 4 % (w/v) galactose per liter) with or without metal supplementation is shown. Control shows yeast growth on medium without metal supplementation.

**Fig. S5.** The photographs show representative performance of BiCET3, BjCET4 and empty vector (control) transgenic tobaccos at day 50 of growing at normal condition.

**Fig. S6.** Testing the exporting activity of BjCET:GFP proteins. The BjCET3:GFP and BjCET4:GFP proteins were expressed in the *zrc1* mutant yeast (YK41) and cultured with oversupplied Zn. Metal tolerance was quantified by using the assay system described in Persans *et al.*, 2001. Data are means  $\pm$  SD of three biological repeats. *zrc1* yeast expressing BjCET3:GFP or BjCET4:GFP show high tolerance to Zn stress than control (*zrc1* expressing pYES2:GFP).

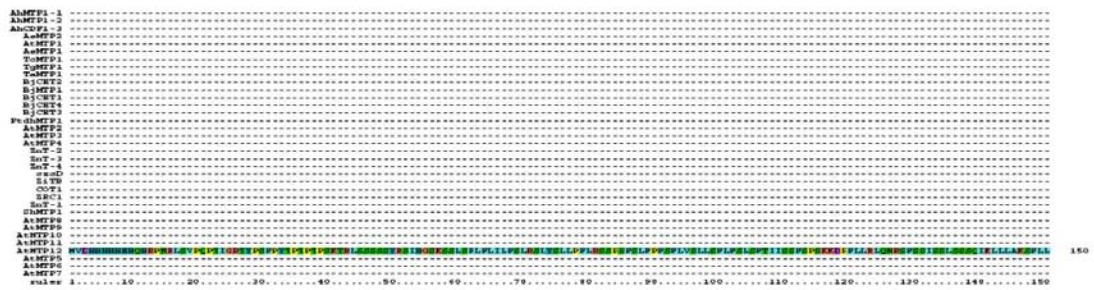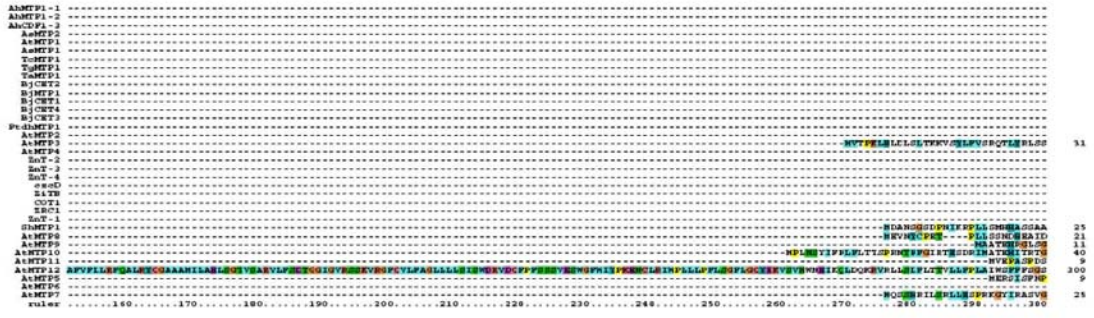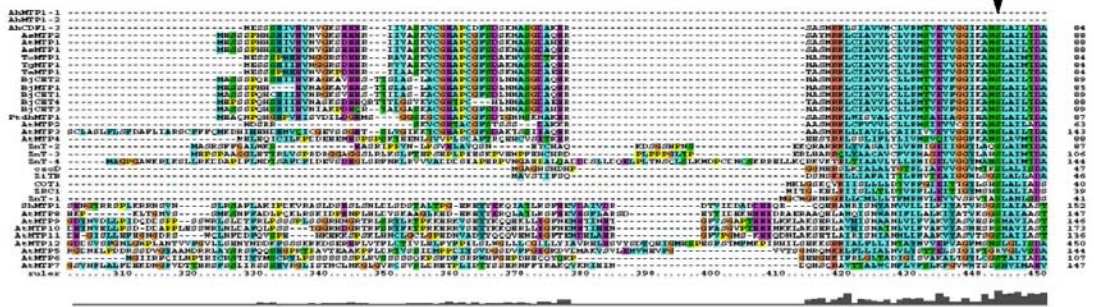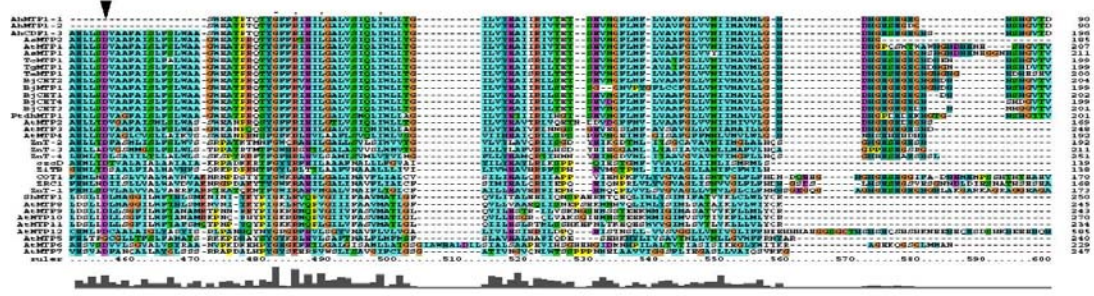

Fig S1-1





A

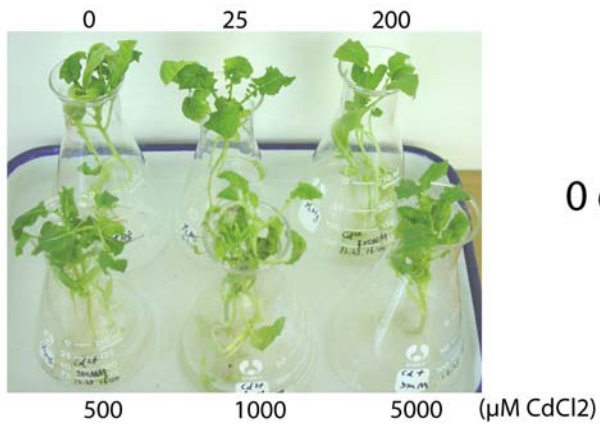

B

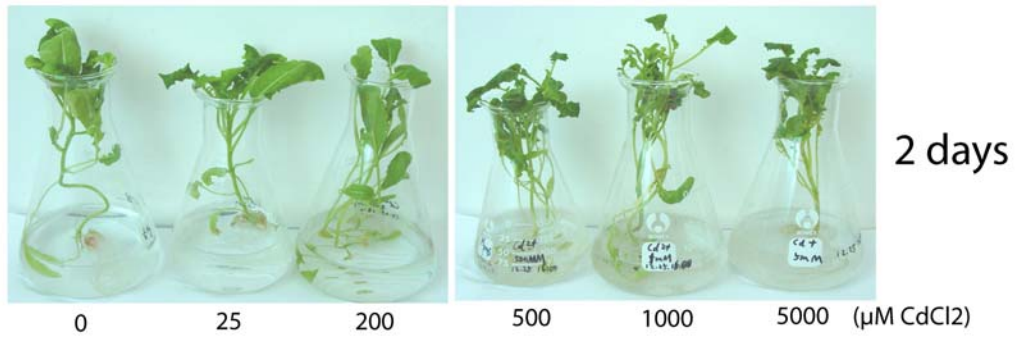

C

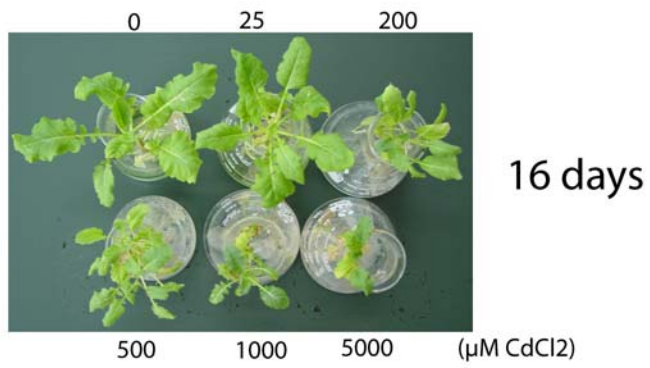

Fig. S2

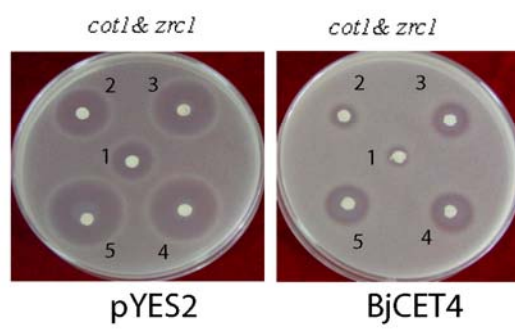

Fig. S3

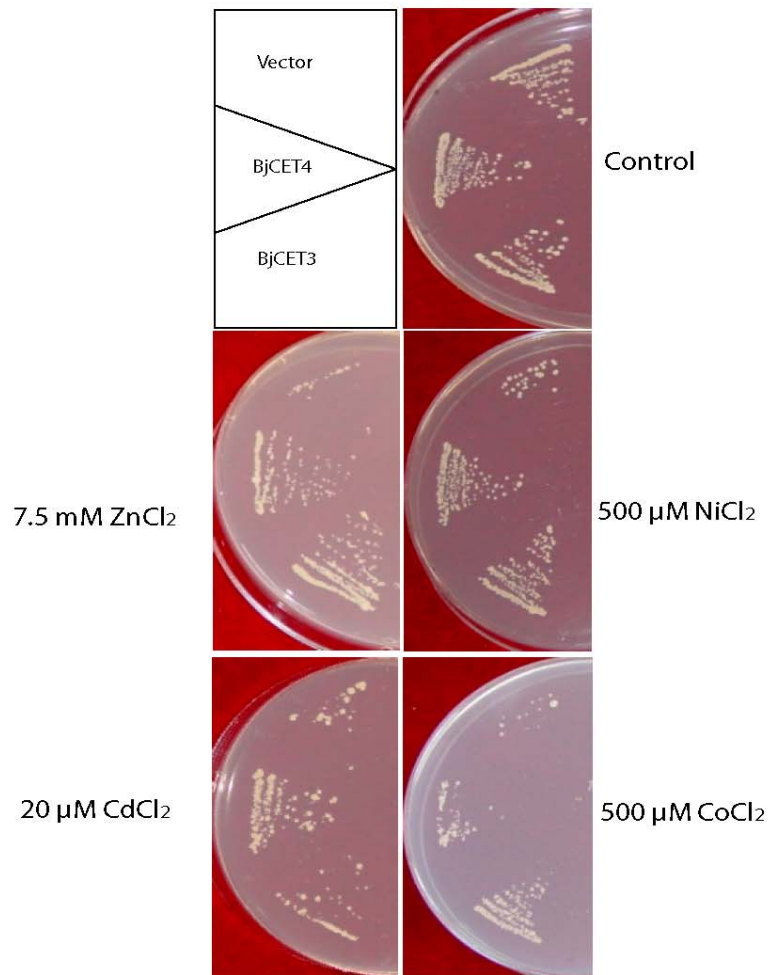

Fig. S4

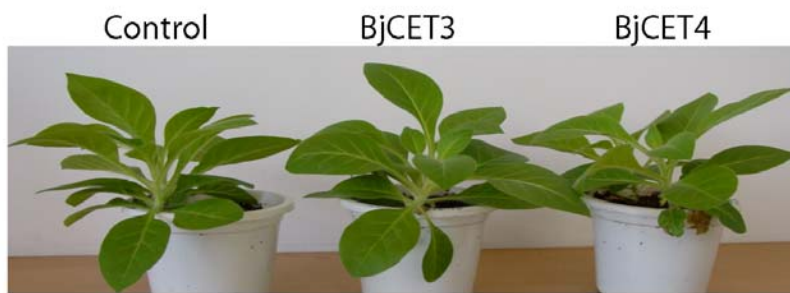

50 days in normal medium

Fig. S5



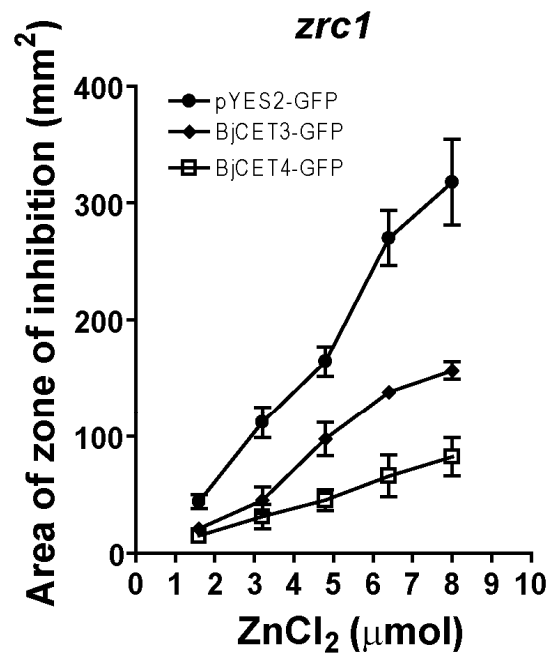

Fig. S6

Table S1 Topology and hydrophile analysis of putative proteins of CE members from *B. juncea* and other species CSS, conserved N-terminal signature sequence; PSS, partial N-terminal signature sequence; TM,

| Gene name      | Species                     | GenBank Accession no. | Residue s | N-terminal signature sequence                                                                 | No. | <u>Transmembrane-spanning regions</u> |         |         |         |          |
|----------------|-----------------------------|-----------------------|-----------|-----------------------------------------------------------------------------------------------|-----|---------------------------------------|---------|---------|---------|----------|
|                |                             |                       |           |                                                                                               |     | TM1                                   | TM2     | TM3     | TM4     | TM5      |
| <i>BjCET1</i>  | <i>B. juncea</i>            | AY187082              | 382       | SLAILLTDAAHLLSD (CSS)                                                                         | 6   | 59-76                                 | 92-111  | 126-145 | 161-182 | 248-269  |
| <i>BjCET2</i>  | <i>B. juncea</i>            | AY188449              | 388       | SLAILLTDAAHLLSD (CSS)                                                                         | 6   | 59-76                                 | 92-111  | 126-145 | 161-182 | 255-274  |
| <i>BjCET3</i>  | <i>B. juncea</i>            | AY188450              | 385       | SLAILLTDAAHLLSD (CSS)                                                                         | 6   | 59-76                                 | 92-111  | 126-145 | 161-182 | 253-272  |
| <i>BjCET4</i>  | <i>B. juncea</i>            | <b>AY188451</b>       | 376       | SLAILLTDAAHLLSD (CSS)                                                                         | 6   | 58-75                                 | 91-110  | 125-144 | 160-181 | 244--263 |
| <i>BjMTP1</i>  | <i>B. juncea</i>            | AY483149              | 382       | SLAILLTDAAHLLSD (CSS)                                                                         | 6   | 55-72                                 | 88-107  | 122-141 | 156-177 | 250-269  |
| <i>ZAT</i>     | <i>A. thaliana</i>          | NM180128              | 398       | SLAILLTDAAHLLSD (CSS)                                                                         | 6   | 58-77                                 | 91-110  | 125-144 | 160-180 | 266-285  |
| <i>AtMTP6</i>  | <i>A. thaliana</i>          | NP182304              | 483       | STAILLADAAHSVSD (CSS)                                                                         | 5   | 89-108                                | 107-130 | 147-163 | 191-212 | 237-257  |
| <i>AtCDF1-</i> | <i>A. halleri</i>           | AI556183              | 389       | SLAILLTDAAHLLSD (CSS)                                                                         | 6   | 54-71                                 | 87-106  | 121-140 | 156-177 | 257-276  |
| <i>TgMTP1</i>  | <i>T. goesingense</i>       | AAK91869              | 390       | SLAIMTDAAHLLSD(CSS)                                                                           | 6   | 54-73                                 | 87-106  | 121-140 | 156-177 | 258-277  |
| <i>ShMTP1</i>  | <i>Stylosanthes hamata</i>  | AY181256              | 415       | SVNSLRSAR <sup>AF</sup> -ASLD(PSS)<br>SVNSLRSAR <sup>AF</sup> -ASLD(PSS)<br>A <sup>GT</sup> N | 5   | 121-141                               | 146-170 | 189-208 | 230-249 | 284-302  |
| <i>ZnTI</i>    | <i>Rattus orvegicus</i>     | Q62720                | 507       | SLAIMLSDSPHMLSD(CSS)                                                                          | 6   | 11-28                                 | 42-61   | 79-101  | 114-134 | 246-270  |
| <i>Col1</i>    | <i>S. cerevisiae</i>        | NP014961              | 439       | SLALLADSPHMLND(CSS)                                                                           | 6   | 10-29                                 | 43-60   | 78-100  | 114-133 | 243-267  |
| <i>ZRC1</i>    | <i>S. cerevisiae</i>        | S56057                | 442       | SLALLADSPHMLND(CSS)                                                                           | 6   | 9-30                                  | 34-59   | 77-99   | 113-132 | 234-263  |
| <i>ZiTB</i>    | <i>Yersinia pestis</i>      | Q8ZGY6                | 312       | SLALLADAGHMLTD(CSS)                                                                           | 6   | 16-35                                 | 48-66   | 84-102  | 114-137 | 159-177  |
| <i>czcd</i>    | <i>Alcaligenes sp. CT14</i> | P94178                | 316       | SLALLISDAAHMLTD(CSS)                                                                          | 6   | 19-37                                 | 47-67   | 84-103  | 119-135 | 156-174  |

| <b>TM6</b> | <b>C-terminal<br/>Cation-efflux<br/>domain</b> | <b>His-rich<br/>domain</b> | <b>Molecular<br/>weight (D)</b> | <b>Isoelectric<br/>point</b> | <b>Solubility<br/>(soluble %)</b> | <b>Hydrophobic<br/>(%)</b> | <b>Hydrophil<br/>ic (%)</b> | <b>Basic (%)</b> | <b>Acidic (%)</b> |
|------------|------------------------------------------------|----------------------------|---------------------------------|------------------------------|-----------------------------------|----------------------------|-----------------------------|------------------|-------------------|
| 275-293    | N-terminus inside                              | TM4 - TM5                  | 42,074                          | 6.32                         | 71                                | 46.1                       | 28.5                        | 14.1             | 11.3              |
| 280-298    | N-terminus inside                              | TM4 - TM5                  | 42,297                          | 6.42                         | 69                                | 46.4                       | 28.6                        | 14.2             | 10.8              |
| 278-296    | N-terminus inside                              | TM4 - TM5                  | 42,426                          | 6.47                         | 69                                | 46.8                       | 27.0                        | 14.8             | 11.4              |
| 269-287    | N-terminus inside                              | TM4 - TM5                  | 41,487                          | 6.05                         | 79                                | 46.3                       | 28.2                        | 13.6             | 12.0              |
| 275-293    | N-terminus inside                              | TM4 - TM5                  | 41,728                          | 6.39                         | 68                                | 45.0                       | 29.6                        | 14.4             | 11.0              |
| 291-309    | N-terminus inside                              | TM4 - TM5                  | 44,064                          | 6.53                         | 68                                | 46.2                       | 27.1                        | 15.3             | 11.3              |
| no         | N-terminus inside                              | no                         | 52,311                          | 7.44                         | 76                                | 44.7                       | 32.7                        | 13.9             | 8.7               |
| 282-300    | N-terminus inside                              | TM4 - TM5                  | 42,920                          | 6.09                         | 76                                | 45.5                       | 27.5                        | 14.4             | 12.6              |
| 283-301    | N-terminus inside                              | TM4 - TM5                  | 42,963                          | 6.03                         | 77                                | 44.6                       | 27.6                        | 14.9             | 13.3              |
| no         | N-terminus outside                             | no                         | 46,701                          | 5.87                         | 56                                | 47.2                       | 28.0                        | 12.5             | 12.3              |
| 312-333    | N-terminus inside                              | TM4 - TM5                  | 55,142                          | 6.43                         | 55                                | 45.2                       | 30.8                        | 13.0             | 11.0              |
| 278-297    | N-terminus inside                              | TM4 - TM5                  | 48,155                          | 6.27                         | 54                                | 43.5                       | 34.4                        | 12.1             | 10.0              |
| 269-288    | N-terminus inside                              | TM4 - TM5                  | 48,345                          | 6.34                         | 62                                | 44.8                       | 32.6                        | 12.4             | 10.2              |
| 179-197    | N-terminus inside                              | no                         | 34,828                          | 6.94                         | 64                                | 52.6                       | 24.7                        | 14.1             | 8.7               |
| 174 -194   | N-terminus outside                             | no                         | 33,741                          | 6.24                         | 52                                | 54.4                       | 26.9                        | 9.8              | 8.9               |

Table S2 Gene name, GenBank accession number and species

| <b>Gene Name</b> | <b>Accession No.</b> | <b>Species</b>                  |
|------------------|----------------------|---------------------------------|
| BjCET1           | AAO64482             | <i>Brassica juncea</i>          |
| BjCET2           | AAO83658             | <i>Brassica juncea</i>          |
| BjCET3           | AAO83659             | <i>Brassica juncea</i>          |
| BjCET4           | AAO83660             | <i>Brassica juncea</i>          |
| BjMTP1           | AAR83910             | <i>Brassica juncea</i>          |
| AtMTP1(ZAT)      | NP_182203            | <i>Arabidosis thaliana</i>      |
| AtMTP2           | NP_191753            | <i>Arabidosis thaliana</i>      |
| AtMTP3           | NP_191440            | <i>Arabidosis thaliana</i>      |
| tMTP4            | NP_180502            | <i>Arabidosis thaliana</i>      |
| AtMTP5           | NP_187817            | <i>Arabidosis thaliana</i>      |
| AtMTP6           | NP_182304            | <i>Arabidosis thaliana</i>      |
| AtMTP7           | NP_564594            | <i>Arabidosis thaliana</i>      |
| AtMTP8           | NP_191365            | <i>Arabidosis thaliana</i>      |
| AtMTP9           | NP_178070            | <i>Arabidosis thaliana</i>      |
| AtMTP10          | NP_173081            | <i>Arabidosis thaliana</i>      |
| AtMTP11          | NP_181477            | <i>Arabidosis thaliana</i>      |
| AtMTP12          | NP_178539            | <i>Arabidosis thaliana</i>      |
| TgMTP1           | AAR83910             | <i>Thlaspi goesingense</i>      |
| TcMTP1           | AAR83907             | <i>Thlaspi caerulescens</i>     |
| TaMTP1           | AAR83906             | <i>Thlaspi arvense</i>          |
| AsMTP1           | AAR83908             | <i>Arabidopsis lyrata</i>       |
| AsMTP2           | AAR83909             | <i>Arabidopsis lyrata</i>       |
| AhCDF1-3         | CAD89013             | <i>Arabidopsis halleri</i>      |
| AhMTP1-1         | AJ704801             | <i>Arabidopsis halleri</i>      |
| AhMTP1-2         | CAG28977             | <i>Arabidopsis halleri</i>      |
| ShMTP1           | AY181256             | <i>Stylosanthes hamata</i>      |
| ZnT-1            | AAA79234             | <i>Rattus norvegicus</i>        |
| ZnT-2            | AAB02775             | <i>Rattus norvegicus</i>        |
| ZnT-3            | AAB39732             | <i>Homo sapiens</i>             |
| ZnT-4            | NP_742063            | <i>Rattus norvegicus</i>        |
| COT1             | CAA99636             | <i>Saccharomyces cerevisiae</i> |
| ZRC1             | CAA88653             | <i>Saccharomyces cerevisiae</i> |
| ZiTb             | NP_670349            | <i>Yersinia pestis</i>          |
| czcD             | BAA11062             | <i>Alcaligenes sp. CT14</i>     |
